# Supplementary material for: The CpG Dinucleotide Adjacent to a κB Site Affects NF-κB Function through Its Methylation
Source: PubMed Central journal article supplement (PMC5372544; doi:10.3390/ijms18030528), 2017-03-01
Supplement: ijms-18-00528-s001.pdf [file ijms-18-00528-s001.pdf]

# The CpG Dinucleotide Adjacent to A $\kappa$ B Site Affects NF- $\kappa$ B Function through Its Methylation

Tao Wang, Jinge Li, Ke Ding, Li Zhang, Qiuru Che, Xiuming Sun, Yumeng Dai, Wei Sun, Meiying Bao, Xiaochun Wang, Liqun Yang, Zhiwei Li\*

The Center for Combinatorial Chemistry and Drug Discovery, School of Pharmaceutical Science, Jilin University, Changchun, China

\* Correspondence: zhiweili@jlu.edu.cn; Tel.: +86-431-8561-9260

Table S1:  $\kappa$ B sequences and their bearing genes used in this study.

| $\kappa$ b site sequence | Human gene name |                |                |              |                |              |              |             |
|--------------------------|-----------------|----------------|----------------|--------------|----------------|--------------|--------------|-------------|
| GGGAATTCC                | <i>CCL2</i>     | <i>NFKB1A</i>  | <i>CD40</i>    | <i>NOD2</i>  | <i>TNFRSF9</i> | <i>PLAU</i>  | <i>CXCL5</i> | <i>MUC2</i> |
| GGGACTTCC                | <i>FABP6</i>    | <i>CD54</i>    | <i>TNFAIP3</i> | <i>LMP2</i>  | <i>TICAM1</i>  | <i>TP53</i>  |              |             |
| GGGATTCC                 | <i>VCAM1</i>    | <i>APOC3</i>   | <i>IL15RA</i>  | <i>TNIP3</i> | <i>BCL3</i>    | <i>NR4A2</i> |              |             |
| GGGGTTTCC                | <i>CCL20</i>    | <i>TRPC1</i>   | <i>CD80</i>    | <i>RELB</i>  | <i>LIPG</i>    | <i>TP53</i>  |              |             |
| GGGGATTCC                | <i>SELE</i>     | <i>TNFAIP3</i> | <i>ELF3</i>    | <i>IRF2</i>  |                |              |              |             |
| GGGGCTTCC                | <i>CD48</i>     | <i>VIM</i>     | <i>PI3</i>     | <i>NFKB2</i> |                |              |              |             |
| GGGATTTCC                | <i>BLR1</i>     | <i>CD69</i>    | <i>IL6</i>     |              |                |              |              |             |
| GGGGAATCC                | <i>RELB</i>     | <i>TFPI2</i>   |                |              |                |              |              |             |
| GGGAGTTCC                | <i>CCL5</i>     | <i>IRF7</i>    |                |              |                |              |              |             |
| GGGGCTCC                 | <i>LTA</i>      | <i>NFKB1</i>   |                |              |                |              |              |             |
| GGGAGATCC                | <i>FLRG</i>     | <i>CCL11</i>   |                |              |                |              |              |             |
| GGGAATCCTCC              | <i>IL2RA</i>    | <i>GZMB</i>    |                |              |                |              |              |             |
| GGGGTTCC                 | <i>EBI3</i>     | <i>BLR1</i>    |                |              |                |              |              |             |
| GGGGAGCC                 | <i>CD74</i>     | <i>IL1A</i>    |                |              |                |              |              |             |
| GGGAACTCC                | <i>CD40</i>     | <i>BLR1</i>    |                |              |                |              |              |             |
| GGGAATCC                 | <i>CD40</i>     | <i>CCL2</i>    |                |              |                |              |              |             |
| GGGACCTCC                | <i>GSTP1</i>    |                |                |              |                |              |              |             |
| GGGGAATCC                | <i>IRF1</i>     |                |                |              |                |              |              |             |
| GGGGATTCC                | <i>PTGS2</i>    |                |                |              |                |              |              |             |
| GGGACGTCC                | <i>CREB3</i>    |                |                |              |                |              |              |             |
| GGGATCCTCC               | <i>CD44</i>     |                |                |              |                |              |              |             |
| GGGGAATCC                | <i>PTX3</i>     |                |                |              |                |              |              |             |
| GGGAATCC                 | <i>NFKB2</i>    |                |                |              |                |              |              |             |
| GGGGATCC                 | <i>CCL5</i>     |                |                |              |                |              |              |             |
| GGGGAGTCC                | <i>EDN1</i>     |                |                |              |                |              |              |             |
| GGGAAATCC                | <i>IFNB1</i>    |                |                |              |                |              |              |             |
| GGGACATCC                | <i>LCN2</i>     |                |                |              |                |              |              |             |
| GGGAGCTCC                | <i>ADAM19</i>   |                |                |              |                |              |              |             |
| GGGAACCTCC               | <i>KCNK5</i>    |                |                |              |                |              |              |             |
| GGGATCTCC                | <i>BTK</i>      |                |                |              |                |              |              |             |
| GGGACATCC                | <i>ALOX12</i>   |                |                |              |                |              |              |             |

Red, -1C  $\kappa$ b site; blue, -1C or D  $\kappa$ b site; green background,  $\kappa$ b site in CGI.

Table S2. Oligonucleotides used for DAPA

| Oligonucleotide             | Sequence (5'→3')                                                                                                         |
|-----------------------------|--------------------------------------------------------------------------------------------------------------------------|
| <i>FABP6</i> kb site -1A    | Biotin-CCTCTTCAAAGGGACTTTCCTACAAGGGACTTTCCTTCCCGTCTA<br>TAGACGGGAAGGAAAGTCCCTTGTAGGAAAGTCCCTTTGAAGAGG                    |
| <i>FABP6</i> kb site -1C    | Biotin-CCTCTTCAAACGGGACTTTCCTACACGGGACTTTCCTTCCCGTCTA<br>TAGACGGGAAGGAAAGTCCCGTGTAGGAAAGTCCCGTTGAAGAGG                   |
| <i>FABP6</i> kb site -1 5mC | Biotin-CCTCTTCAA/5mC/GGGACTTTCCTACA/5mC/GGGACTTTCCTTCCCGTCTA<br>TAGACGGGAAGGAAAGTCC/5mC/GTGTAGGAAAGTCC/5mC/GTTGAAGAGG    |
| <i>CCL2</i> kb site -1A     | Biotin-CCTCTTCAAAGGGAACTTTCCTACAAGGGAATTCCTTCCCGTCTA<br>TAGACGGGAAGGAAATTCCTTGTAGGAAAGTCCCTTTGAAGAGG                     |
| <i>CCL2</i> kb site -1C     | Biotin-CCTCTTCAAACGGGAACTTTCCTACACGGGAAATTCCTTCCCGTCTA<br>TAGACGGGAAGGAAATTCCTCGTGTAGGAAAGTCCCGTTGAAGAGG                 |
| <i>CCL2</i> kb site -1 5mC  | Biotin-CCTCTTCAA/5mC/GGGAATTCCTACA/5mC/GGGAATTCCTTCCCGTCTA<br>TAGACGGGAAGGAAATTC/5mC/GTGTAGGAAAGTTC/5mC/GTTGAAGAGG       |
| <i>PTX3</i> kb site -1C     | Biotin-CCTCTTCAAAGGGAACTCCCGTACAAGGGAACTCCCGTTCCCGTCTA<br>TAGACGGGAACGGGAGTTCCCTTGTACGGGAGTCCCTTTGAAGAGG                 |
| <i>PTX3</i> kb site -1 5mC  | Biotin-CCTCTTCAAAGGGAACTCC/5mC/GTACAAGGGAACTCC/5mC/GTTCCCGTCTA<br>TAGACGGGAA/5mC/GGGAGTTCCCTTGT/5mC/GGGAGTCCCTTTGAAGAGG  |
| <i>FLRG</i> kb site -1C     | Biotin-CCTCTTCAAAGGGAGATTCCCGTACAAGGGAGATTCCCGTTCCCGTCTA<br>TAGACGGGAACGGGAATTCCTTGTACGGGAATTCCTTTGAAGAGG                |
| <i>FLRG</i> kb site -1 5mC  | Biotin-CCTCTTCAAAGGGAGATTCC/5mC/GTACAAGGGAGATTCC/5mC/GTTCCCGTCTA<br>TAGACGGGAA/5mC/GGGAATTCCTTGT/5mC/GGGAATTCCTTTGAAGAGG |
| NC                          | Biotin-CCTCTTCAAATTGAACTTACTACAATTGAACTTACTTCCCGTCTA<br>TAGACGGGAAGTAAGTTCAATTGTAGTAAGTTCAATTTGAAGAGG                    |

Table S3. Primers used for Plasmids construction and site-directed mutagenesis

| Primer      | Sequence (5'→3')                                    |
|-------------|-----------------------------------------------------|
| FABP6- f    | CGCGTCTCTTCAAAGGGACTTTCCTACAAGGGACTTTCCTTCCCGTCTAC  |
| FABP6- r    | TCGAGTAGACGGGAAGGAAAGTCCCTTGTAGGAAAGTCCCTTTGAAGAGGA |
| FABP6-M-f   | CGCGTCTCTTCAAACGGGACTTTCCTACACGGGACTTTCCTTCCCGTCTAC |
| FABP6-M-r   | TCGAGTAGACGGGAAGGAAAGTCCCGTGTAGGAAAGTCCCGTTGAAGAGGA |
| CCL2-E-f    | ACGTGGTACCGTGTGTCCCAAGCGAG                          |
| CCL2-E-r    | GATCGTAGCTGCATCCTTACCATGAACT                        |
| CCL2-P-f    | GATCGTAGCAATTCAGTTCAATGTTTACA                       |
| CCL2-P-r    | AGTCTCGAGGCTGGAGGCGAGAGTGCGAG                       |
| CCL2-Mut1-f | GCATTCTTCTACGGGATCCGGAACTTCCAAAGCTGC                |
| CCL2-Mut1-r | GCAGTTTGGAAAGTCCCGGATCCCGTAGAAGAGAATGC              |
| CCL2-Mut2-f | CAAAGCTGCCTCCTCAGAGCGGGAATTCCTACTACTTC              |
| CCL2-Mut2-r | GAAAGTGTAGTGGAAATTCCTCGTCTGAGGAGGCAGCTTG            |

Table S4. Primers used for BSP

| Primers used for BSP |                              |
|----------------------|------------------------------|
| Primer               | Sequence (5'→3')             |
| GSTP1-M-f            | TTTGTTGTTTGTATTTTTTAGGTTT    |
| GSTP1-M-r            | ATACTAAAACTCTAAACCCCATCC     |
| RelB-M-f             | GTTTAAGTTTATTGGGAGATTAAAG    |
| RelB-M-r             | ACCCAAAACTAACCCAAACC         |
| IRF7-M-f             | GGGTTTTAGTATTTGGGTGTTAGAG    |
| IRF7-M-r             | AAACTATAATAAAATAACTCCATCTC   |
| TNFIP3-M-f           | GYGGGGTAGGGAAAGG             |
| TNFIP3-M-r           | AACTCCAACTCRCTTAACC          |
| TFPI2-M-f            | TTTTATGTTTTTAAGAGGTGGATT     |
| TFPI2-M-r            | AAACCTAAAAATAACTAATTCATACAC  |
| PTX3-M-f             | GATTTTTTTTTAATTAATTTGATTGTAG |
| PTX3-M-r             | AAATCCTTAATAAATACTAAAAAAACC  |
| FLRG-M-f             | TTTTGTGTTTGTATTTTTTTAAGT     |
| FLRG-M-r             | CCTAACCTTAACCTCTAACATTTC     |
| CCL2-M-f             | TTTTATAGTTTTTTGGGGTTTT       |
| CCL2-M-r             | ATCTACCTCCACTCTACTCTATCAA    |

Table S5. Primers used for RT-PCR

| Primer      | Sequence (5'→3')      |
|-------------|-----------------------|
| RelB-T-f    | GCCTCGTGGGAAAGACT     |
| RelB-T-r    | TGTCGAGAGCAAGTAGAGC   |
| TNFAIP3-T-f | ACCCATTGTTCTCGGCTAT   |
| TNFAIP3-T-r | CCCTGCTCGCTGTTTTCC    |
| CCL2-T-f    | TAGCAGCCACCTTCATTCC   |
| CCL2-T-r    | GCTTGGGGTCAGCACAGAT   |
| IκBα-T-f    | AGTACGAGCAGATGGTCAAG  |
| IκBα-T-r    | TCATGGATGATGGCCAAGTG  |
| TFPI2-T-f   | CCCTACTTCTCCGTTACTACT |
| TFPI2-T-r   | TCTGAAAACCTGTTCTCAAT  |
| IRF7-T-f    | CAGATCCAGTCCCAACCAA   |
| IRF7-T-r    | GCAGCAGTTCCTCCGTGT    |
| GAPDH-T-f   | AGCCACATCGCTCAGACACC  |
| GAPDH-T-r   | ACGTACTCAGCGCCAGCATC  |

U937 *CCL2* κB site (-2822/-2513)

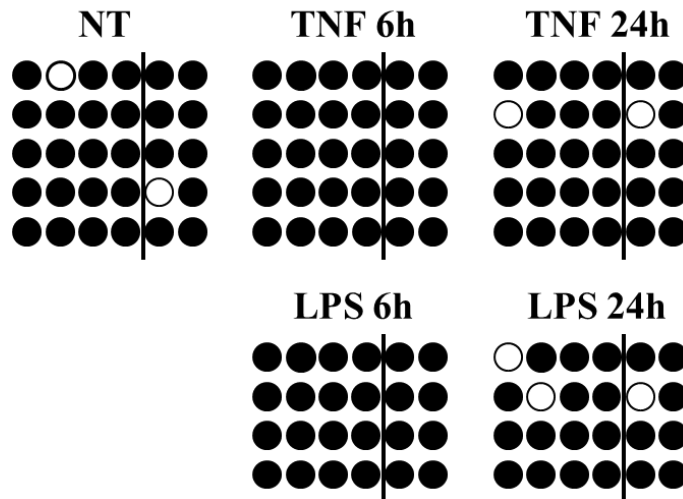

Figure S1. Methylation status around the κB sites of *CCL2* was not changed upon NF-κB activation by TNFα or LPS in U937 cells. Genomic DNAs were isolated from U937 cells treated with TNFα (10 ng/ml) or LPS (1μg/ml) for the indicated time and methylation status was determined by BSP. The κB site was shown as a vertical line.

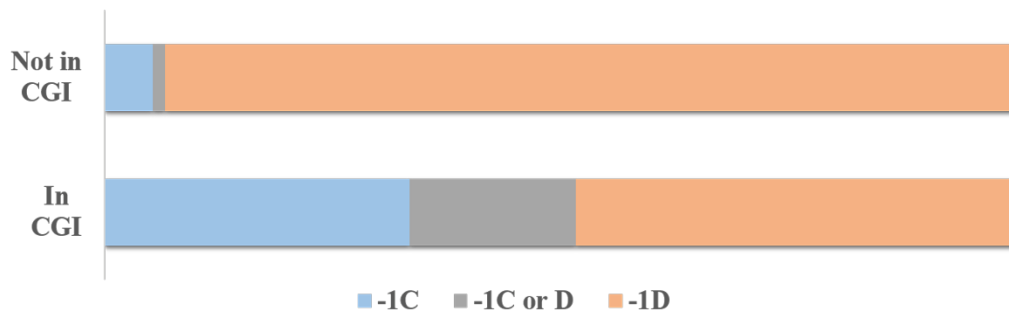

Figure S2. The ratio between -1C κB sites and total κB sites outside CGIs is substantially lower than that inside CGIs in *VCAM*, *CCL2* and *RelB* of multiple vertebrate.
